# Supplementary material
Source: PubMed Central journal article supplement (PMC1986587)

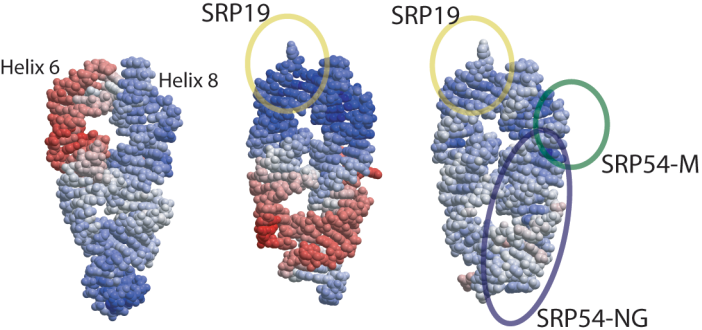

Supplement: pnas_0702467104_1.pdf [file pnas_0702467104_1.pdf]

A

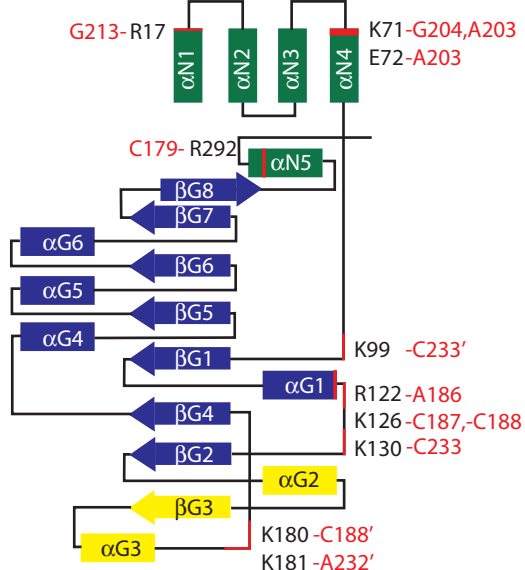

B

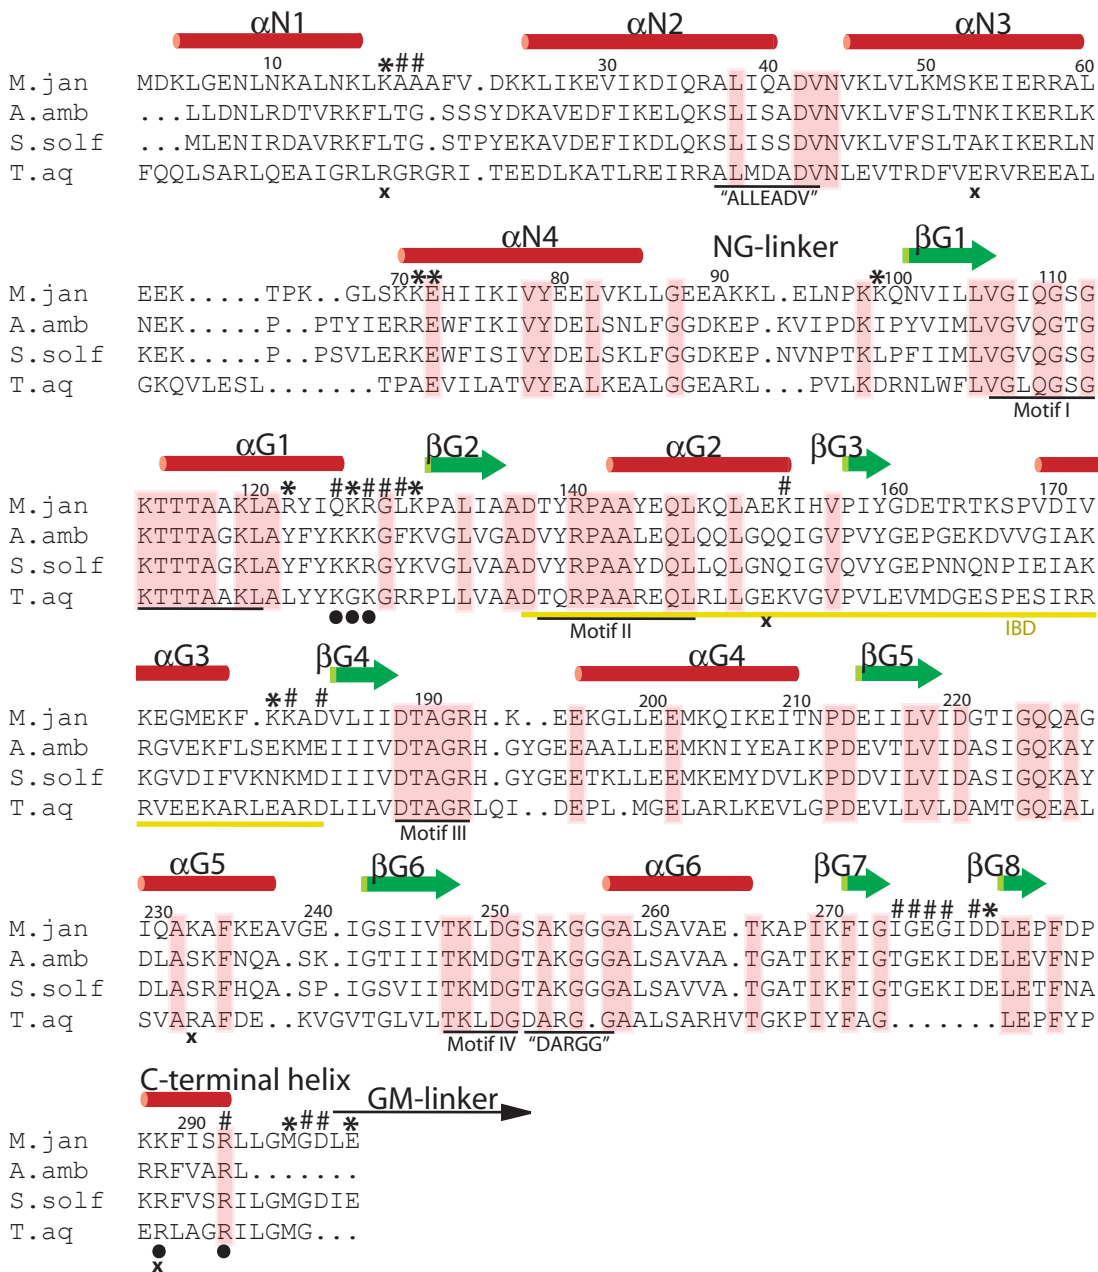

Supplement: pnas_0702467104_2.pdf [file pnas_0702467104_2.pdf]

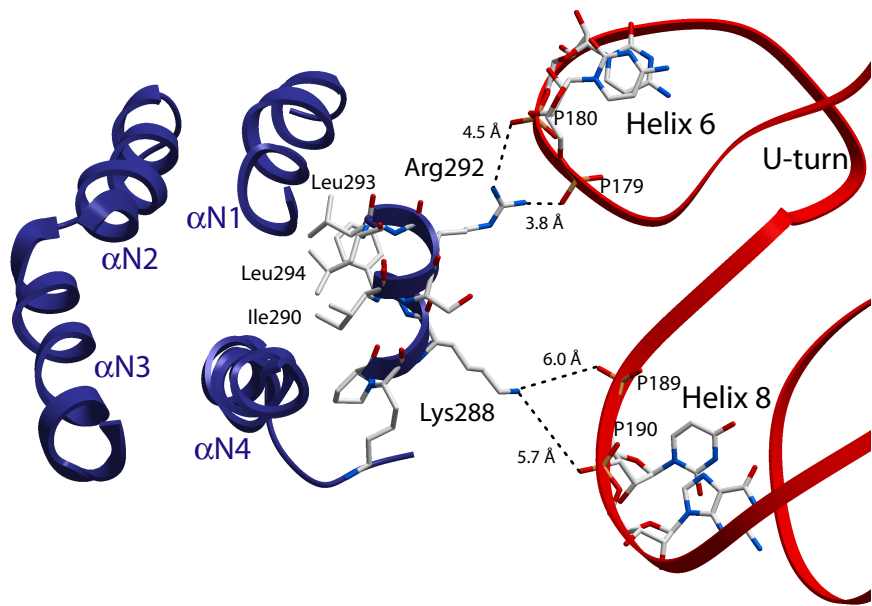

Supplement: pnas_0702467104_3.pdf [file pnas_0702467104_3.pdf]

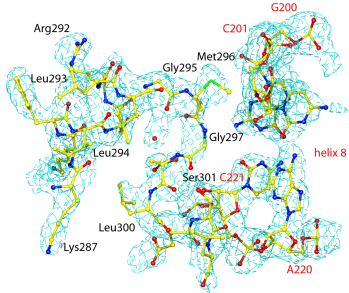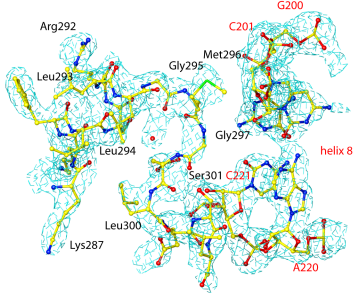

Supplement: pnas_0702467104_4.pdf [file pnas_0702467104_4.pdf]

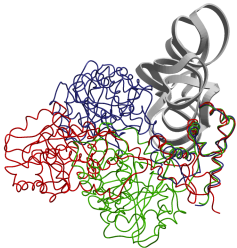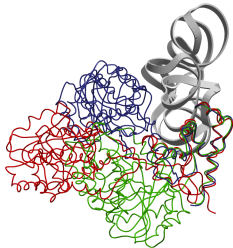

Supplement: pnas_0702467104_5.pdf [file pnas_0702467104_5.pdf]
